# Supplementary material for: WITHDRAWN: Comprehensive assessment of atmospheric interactions between Criegee intermediate and simplest Imine (CH2NH) in gas and aqueous phase environments
Source: Research Square preprint supplement (doi:10.21203/rs.3.rs-6756397/v1), 2025-06-06
Supplement: Supplementary file 1 [file 984b48927582d2a795a4422e.docx]

**Manas Ranjan Dasha,1 Naga Venkateswara Rao Nulakanib,c,1 and Mohamad Akbar Ali*b,c**

aDepartment of Chemistry, School of Physical Sciences, DIT University, Uttarakhand 248009, India

bDepartment of Chemistry, Khalifa University of Science and Technology, Abu Dhabi, United Arab Emirates

cCenter for Catalysis and Separation, Khalifa University of Science and Technology, P.O. Box 127788, Abu Dhabi, UAE.

1Equal contribution

*Corresponding author e-mail: akbar.mohamad@ku.ac.ae

Table of Contents

Table S1: Comparison of each species enthalpies (in kcal mol-1) for CH2OO + CH2NH reaction with its isoelectronic analogous reactions.……………………………………………………….Page 2

Table S2: Cartesian coordinates of reactants, complexes, intermediates, products and transition states using M06-2X/6-311++G(3df,3pd) level ……………………………………………………….Page 3-15

**Figure S1**: Zero-point corrected potential energy surface for the water assisted CH2OO + CH2CH2 reaction obtained using CCSD(T)/6-311++G (3df,3pd)//M06-2X/6-311++G(3df,3pd) level.………………………………………………………………………………….. Page 16

**Figure S2.** Structural and geometrical changes for the water-assisted CH2O + CH2CH2 reaction calculated using M06-2X/6–311++G (3df,3pd).……………………………..Page 16

**Figure S3.** Dynamic trajectories and varying bond lengths for the cyclic ozonide (SOZ) formation from CH2OO and CH2O reaction at the air-water interface..………………………………………………………………………………Page 17

**Methodology**

The <*Ŝ*2> eigenvalues were monitored to evaluate the spin contamination for the wave function of the open-shell radicals. The T1-diagnostic values obtained at the CCSD(T)/6-311++G(3df, 3pd) level of theory were analyzed to validate the single-reference method and were found to be within the acceptable range (i.e., ≤ 0.02) for all important species (Lee and Taylor, 1989) Overall, the combination of CCSD(T)//M06-2X functional has been employed in numerous research studies, providing a reasonably accurate description of the thermochemistry and chemical kinetics of many atmospheric reactions (Ali, 2020; Ali et al., 2022, 2019; Ali & Balaganesh, 2023; Ali and Muthiah, 2022; Dash et al., 2024; Dash and Ali, 2023a, 2023b; Dash and Mishra, 2022; Pandit and Dash, 2024).

**2.2. Chemical Kinetics Analysis**

For pressure-dependent kinetics, Rice–Ramsperger–Kassel–Marcus (RRKM)/master equation (ME) was used, and the energy-dependent specific unimolecular rate constants k*(E)* is given by Eq. (1)

(1)

where *L*~~≠~~ is the reaction path degeneracy, *h* is Planck's constant, (E) is the density of states of the reactant molecule; is the sum-of-states of the transition state, and E*0* is the reaction critical energy, which depends on angular momentum. The sums and densities of states were computed using the DenSum code implemented in the MultiWell Program (Barker, 2023, 2009, 2001). The obtained vibrational frequencies and the rotational constants (M062X) were applied to compute the density of states and the sum of states based on the Stein–Rabinovitch version of the Beyer–Swinehart algorithm (Beyer and Swinehart, 1973; Stein and Rabinovitch, 1973).

The total rate constants kbimol (T, M) on each surface were determined by utilizing Eq. (2)

) (2)

The *k*(E) calculated using the modified sums of states of the transition state reflect the tunneling effects. Eckart’s tunneling was used to initialize the chemical activation distribution if the "CHEMACT" and "TUN" keywords were selected. The is the branching fraction *(f)* of the reaction going back to the reactants and is a high-pressure limit rate constant

**Table S1.** Comparison of each species enthalpies (in kcal mol-1) for •CH2OO• + •CH2NH reaction with its isoelectronic analogous reactions.

| **•CH2OO + CH2NH →**  ***aThis Work*** | | **CH2OO + HCHO →**  ***bJalan et al.*** **(c*Long et al.)* [d*Zhang et al.*]** | | **CH2OO + CH2CH2 →**  ***eSun et al.*** | |
| --- | --- | --- | --- | --- | --- |
| CH2OO···CH2NH | -4.9 | CH2OO···HCHO | -6.9 (-6.3)  [-6.5] | ComA | -1.9 |
| TSadn | -3.8 | TSC | -6.3 (-5.3)  [-5.1] | TSA | 1.1 |
| IMn | -55.7 | SOZ | -51.3 (-49.5)  [-50.7] | IMA | -60.9 |
| TSison | -15.3 | TSiso | -22.6 | TSIso | -24.3 |
| HMFn | -134.1 | HMF | -128.2 | IMIso | -120.7 |
| TSdn | -6.9 | TSD | -9.6 | TSD3 | -19.5 |
| TSHMF1n | -104.7 | TSHMF | -107.4 | TSD1 | -83.0 |
| TSHMF2n | -79.2 | - | - | TSD2 | -19.4 |
| OH-CH=NH +  HCHO | -108.9 | HCOOH···HCHO | -124.0 | CH2=CH-OH +  HCHO | -95.6 |
| NH2CHO +  HCHO | -120.0 | - | - | CH3CHO +  HCHO | -105.4 |

a CCSD(T)/6-311++G(3df,3pd)//M06-2X/6-311++G(3df,3pd)

b RCCSD(T)-F12a/VTZ-F12//B3LYP/MG3S

c W3XL//CCSD(T)-F12a/cc-pVDZ-F12

d CCSD(T)-F12/cc-pVDZ-F12//M06-2X/6-311++G(3df,2pd)

e HL//M06-2X/AUG-cc-pVTZ

Table S2: Cartesian coordinates of reactants, complexes, intermediates, products and transition states using M06-2X/6-311++G(3df,3pd) level.

**CH2NH**

---------------------------------------------------------------------

Center Atomic Atomic Coordinates (Angstroms)

Number Number Type X Y Z

---------------------------------------------------------------------

1 6 0 0.001584 0.000000 -0.000651

2 1 0 -0.005232 0.000000 1.092228

3 1 0 0.976583 0.000000 -0.486096

4 7 0 -1.035597 0.000000 -0.716465

5 1 0 -1.874109 0.000000 -0.136286

---------------------------------------------------------------------

**CH2OO**

---------------------------------------------------------------------

Center Atomic Atomic Coordinates (Angstroms)

Number Number Type X Y Z

---------------------------------------------------------------------

1 6 0 0.000000 0.242431 -1.121725

2 8 0 0.000000 -0.431500 -0.083112

3 8 0 0.000000 0.196917 1.095843

4 1 0 0.000000 1.324368 -1.040018

5 1 0 0.000000 -0.319878 -2.045609

---------------------------------------------------------------------

**CH2OO···CH2NH**

---------------------------------------------------------------------

Center Atomic Atomic Coordinates (Angstroms)

Number Number Type X Y Z

---------------------------------------------------------------------

1 6 0 -1.173358 0.889136 0.056930

2 8 0 -1.221810 -0.267868 -0.379383

3 8 0 -0.857201 -1.261539 0.472233

4 1 0 -0.958788 1.046552 1.105867

5 1 0 -1.403300 1.674055 -0.650891

6 6 0 1.575115 -0.299639 -0.029447

7 1 0 1.221929 -0.711952 -0.970404

8 1 0 2.054425 -0.993368 0.660354

9 7 0 1.407731 0.933352 0.204181

10 1 0 1.764298 1.176997 1.127237

---------------------------------------------------------------------

**TSadn**

---------------------------------------------------------------------

Center Atomic Atomic Coordinates (Angstroms)

Number Number Type X Y Z

---------------------------------------------------------------------

1 6 0 -1.021663 0.892988 0.076604

2 8 0 -1.169244 -0.258322 -0.380310

3 8 0 -0.754421 -1.259731 0.458775

4 1 0 -0.898670 1.019244 1.144662

5 1 0 -1.250092 1.703233 -0.602295

6 6 0 1.498228 -0.316360 -0.040279

7 1 0 1.210494 -0.768508 -0.983165

8 1 0 2.035863 -0.942254 0.668372

9 7 0 1.231203 0.911540 0.162502

10 1 0 1.527343 1.203898 1.091811

---------------------------------------------------------------------

**IMn**

---------------------------------------------------------------------

Center Atomic Atomic Coordinates (Angstroms)

Number Number Type X Y Z

---------------------------------------------------------------------

1 6 0 -1.095551 0.342224 -0.006801

2 8 0 -0.551861 -0.975456 0.244646

3 8 0 0.819391 -0.775043 0.576175

4 1 0 -1.868751 0.570353 0.724794

5 1 0 -1.503715 0.316820 -1.016730

6 6 0 1.129094 0.402671 -0.143052

7 1 0 1.208543 0.176502 -1.209331

8 1 0 2.057290 0.799661 0.258371

9 7 0 0.004032 1.276480 0.088227

10 1 0 0.062900 1.614272 1.041266

---------------------------------------------------------------------

**TSison**

---------------------------------------------------------------------

Center Atomic Atomic Coordinates (Angstroms)

Number Number Type X Y Z

---------------------------------------------------------------------

1 6 0 -1.029786 0.235599 -0.313710

2 8 0 -0.631320 -0.985152 -0.071481

3 8 0 1.466323 -0.467059 -0.915599

4 1 0 -1.777578 0.583555 0.424121

5 1 0 -1.495564 0.357757 -1.309738

6 6 0 1.272380 0.432850 -0.029482

7 1 0 2.152833 0.942731 0.392811

8 1 0 0.914589 -0.238429 0.889566

9 7 0 0.102104 1.198536 -0.180911

10 1 0 -0.022295 1.970947 0.459417

---------------------------------------------------------------------

**HMFn**

---------------------------------------------------------------------

Center Atomic Atomic Coordinates (Angstroms)

Number Number Type X Y Z

---------------------------------------------------------------------

1 6 0 -0.930729 0.845518 0.541540

2 8 0 -1.051194 -0.307267 1.321021

3 1 0 -1.384277 1.665127 1.091608

4 1 0 -1.431582 0.718057 -0.419183

5 6 0 1.189020 0.340591 -0.487492

6 1 0 -0.749264 -1.042280 0.776569

7 7 0 0.450143 1.191905 0.262935

8 1 0 0.925776 1.872183 0.830605

9 8 0 0.732618 -0.650360 -1.011192

10 1 0 2.243874 0.635036 -0.586136

---------------------------------------------------------------------

**TSdn**

---------------------------------------------------------------------

Center Atomic Atomic Coordinates (Angstroms)

Number Number Type X Y Z

---------------------------------------------------------------------

1 6 0 -0.907649 0.250591 0.004895

2 8 0 -0.439206 -0.885695 0.366578

3 8 0 1.457485 -0.479946 0.499596

4 1 0 -1.652105 0.713820 0.660893

5 1 0 -1.073378 0.434154 -1.062161

6 6 0 1.329234 0.690965 -0.121397

7 1 0 1.495888 0.697657 -1.200420

8 1 0 2.380209 0.567694 0.491980

9 7 0 0.360518 1.511832 0.329882

10 1 0 0.314350 1.417291 1.343824

---------------------------------------------------------------------

**TSHMF1n**

---------------------------------------------------------------------

Center Atomic Atomic Coordinates (Angstroms)

Number Number Type X Y Z

---------------------------------------------------------------------

1 6 0 0.673030 -1.154546 1.701917

2 8 0 1.674672 -1.505151 1.037015

3 1 0 0.808060 -0.513110 2.582663

4 1 0 -0.204530 -1.812151 1.762238

5 6 0 -0.016325 0.057643 -0.614195

6 1 0 -0.422761 0.779580 -1.322179

7 7 0 -0.248852 0.130346 0.642661

8 1 0 -0.802568 0.921374 0.939644

9 1 0 1.198388 -1.358314 -0.372376

10 8 0 0.709595 -0.874887 -1.146472

---------------------------------------------------------------------

**TSHMF2n**

---------------------------------------------------------------------

Center Atomic Atomic Coordinates (Angstroms)

Number Number Type X Y Z

---------------------------------------------------------------------

1 6 0 -1.105123 0.724695 0.551316

2 8 0 -1.251820 -0.449692 1.117413

3 1 0 -1.378356 1.630074 1.114644

4 1 0 -1.380922 0.833269 -0.510603

5 6 0 1.123881 0.303055 -0.611679

6 1 0 0.148266 -0.131186 1.248646

7 7 0 0.539917 0.756373 0.607014

8 1 0 1.038687 1.548174 1.010111

9 1 0 0.537086 -0.515766 -1.049982

10 8 0 2.114365 0.766455 -1.076669

---------------------------------------------------------------------

**OH-CH=NH**

---------------------------------------------------------------------

Center Atomic Atomic Coordinates (Angstroms)

Number Number Type X Y Z

---------------------------------------------------------------------

1 6 0 -0.013334 0.086627 -0.570503

2 1 0 -0.437444 0.740346 -1.330432

3 7 0 -0.202971 0.149570 0.670285

4 1 0 -0.826154 0.914301 0.903631

5 1 0 1.123978 -1.393320 -0.417164

6 8 0 0.773402 -0.841782 -1.128734

**---------------------------------------------------------------------**

**HCHO**

---------------------------------------------------------------------

Center Atomic Atomic Coordinates (Angstroms)

Number Number Type X Y Z

---------------------------------------------------------------------

1 6 0 -1.279616 0.692142 0.564489

2 8 0 -1.200061 -0.378899 1.086242

3 1 0 -1.316421 1.624015 1.155477

4 1 0 -1.320122 0.801088 -0.533438

---------------------------------------------------------------------

**NH2CHO**

---------------------------------------------------------------------

Center Atomic Atomic Coordinates (Angstroms)

Number Number Type X Y Z

---------------------------------------------------------------------

1 6 0 1.143927 0.275940 -0.574093

2 1 0 -0.021779 0.104702 1.118802

3 7 0 0.679141 0.643987 0.644733

4 1 0 1.050353 1.471993 1.080789

5 1 0 0.666794 -0.643970 -0.948726

6 8 0 1.983767 0.874453 -1.194065

---------------------------------------------------------------------

**H2O**

---------------------------------------------------------------------

Center Atomic Atomic Coordinates (Angstroms)

Number Number Type X Y Z

---------------------------------------------------------------------

1 8 0 1.090345 -0.580966 0.000000

2 1 0 2.048162 -0.544038 0.000000

3 1 0 0.805386 0.334288 0.000000

---------------------------------------------------------------------

**CH2OO···CH2NH···H2O**

---------------------------------------------------------------------

Center Atomic Atomic Coordinates (Angstroms)

Number Number Type X Y Z

---------------------------------------------------------------------

1 6 0 -0.971125 0.893745 -1.566002

2 1 0 -1.656095 1.370510 -2.266179

3 7 0 -0.337965 1.517972 -0.660547

4 1 0 -0.565931 2.505003 -0.688883

5 1 0 -0.268662 -0.838931 -1.139625

6 8 0 -0.890808 -0.400561 -1.775863

7 8 0 0.637509 -1.574010 0.057155

8 6 0 0.356399 -1.101576 1.130923

9 1 0 0.880378 -1.408871 2.043084

10 1 0 -0.448657 -0.362300 1.234252

11 8 0 1.648280 1.056055 1.289966

12 1 0 2.484930 0.849237 0.869894

13 1 0 1.029030 1.248008 0.557206

---------------------------------------------------------------------

**TSadn···H2O**

---------------------------------------------------------------------

Center Atomic Atomic Coordinates (Angstroms)

Number Number Type X Y Z

---------------------------------------------------------------------

1 6 0 -1.050188 0.930612 0.503684

2 8 0 -1.046514 0.154216 -0.477749

3 8 0 -0.518717 -1.071212 -0.213558

4 1 0 -0.980023 0.510288 1.498205

5 1 0 -1.312944 1.959078 0.289587

6 6 0 1.478019 -0.168725 0.034792

7 1 0 1.476472 -0.066221 -1.044083

8 1 0 1.837873 -1.106696 0.446173

9 7 0 1.250664 0.875550 0.752207

10 1 0 1.337688 0.665071 1.743273

11 8 0 0.390016 3.422632 -0.141849

12 1 0 1.048196 4.068867 -0.397446

13 1 0 0.874579 2.622557 0.132667

---------------------------------------------------------------------

**IMn···H2O**

---------------------------------------------------------------------

Center Atomic Atomic Coordinates (Angstroms)

Number Number Type X Y Z

---------------------------------------------------------------------

1 6 0 1.217259 0.209468 -0.027402

2 8 0 0.586393 -1.088533 0.031239

3 8 0 -0.810422 -0.858902 -0.148098

4 1 0 1.938935 0.228370 -0.841784

5 1 0 1.691011 0.382031 0.938642

6 6 0 -0.969619 0.463497 0.317163

7 1 0 -0.907971 0.502816 1.407267

8 1 0 -1.921701 0.830977 -0.055981

9 7 0 0.160328 1.179160 -0.242928

10 1 0 0.007100 1.290914 -1.237996

11 8 0 0.705660 2.298381 2.281805

12 1 0 0.546985 2.326871 1.327556

13 1 0 0.833643 3.205161 2.561954

---------------------------------------------------------------------

**TSison···H2O**

---------------------------------------------------------------------

Center Atomic Atomic Coordinates (Angstroms)

Number Number Type X Y Z

---------------------------------------------------------------------

1 6 0 -0.762854 0.401485 -0.560959

2 8 0 0.138372 -0.130948 -1.336436

3 8 0 1.745197 1.350558 -0.486492

4 1 0 -1.518389 -0.325536 -0.206235

5 1 0 -1.344859 1.211700 -1.042964

6 6 0 1.244777 0.806803 0.556120

7 1 0 1.840427 0.820299 1.483235

8 1 0 1.287700 -0.346286 0.258895

9 7 0 -0.149782 0.912458 0.700624

10 1 0 -0.560160 0.569616 1.560488

11 8 0 -2.809394 1.156815 1.434484

12 1 0 -2.375298 1.962991 1.142335

13 1 0 -3.704027 1.409472 1.669116

---------------------------------------------------------------------

**HMFn···H2O**

---------------------------------------------------------------------

Center Atomic Atomic Coordinates (Angstroms)

Number Number Type X Y Z

---------------------------------------------------------------------

1 6 0 -0.818852 0.677303 1.053729

2 8 0 0.126760 0.135074 1.924749

3 1 0 -1.237347 1.561817 1.525355

4 1 0 -1.611548 -0.034628 0.828309

5 6 0 0.348077 0.148277 -0.998563

6 1 0 0.373921 -0.726642 1.574443

7 7 0 -0.227011 1.089141 -0.215248

8 1 0 0.085511 2.040081 -0.324695

9 8 0 0.234692 -1.043297 -0.801131

10 1 0 0.913140 0.556163 -1.848195

11 8 0 -2.684957 -0.672860 -1.241838

12 1 0 -1.882922 -1.198676 -1.155414

13 1 0 -2.361842 0.220614 -1.376653

---------------------------------------------------------------------

**TSdn···H2O**

---------------------------------------------------------------------

Center Atomic Atomic Coordinates (Angstroms)

Number Number Type X Y Z

---------------------------------------------------------------------

1 6 0 -0.614712 0.845700 -0.033301

2 8 0 -0.623056 -0.372459 -0.421082

3 8 0 1.166967 -0.933976 0.053576

4 1 0 -1.364103 1.135365 0.711712

5 1 0 -0.342163 1.632453 -0.743722

6 6 0 1.584935 0.300896 0.321178

7 1 0 2.068158 0.861398 -0.481623

8 1 0 2.317215 -0.560146 0.776435

9 7 0 0.800815 1.033210 1.141432

10 1 0 0.403330 0.422596 1.852622

11 8 0 1.501259 3.275123 -0.399384

12 1 0 1.797346 4.159102 -0.179726

13 1 0 1.250673 2.854898 0.434594

---------------------------------------------------------------------

**TSHMF1n···H2O**

---------------------------------------------------------------------

Center Atomic Atomic Coordinates (Angstroms)

Number Number Type X Y Z

---------------------------------------------------------------------

1 6 0 0.737726 -0.993700 1.664840

2 8 0 1.801676 -0.972161 1.012452

3 1 0 0.567554 -0.239549 2.443622

4 1 0 0.195656 -1.935361 1.802563

5 6 0 -0.316359 -0.025093 -0.707058

6 1 0 -0.843569 0.666981 -1.359134

7 7 0 -0.643555 -0.222781 0.508146

8 1 0 -1.377291 0.388095 0.841051

9 1 0 1.257100 -1.036717 -0.585495

10 8 0 0.678082 -0.642708 -1.288918

11 8 0 1.595231 1.756592 0.536818

12 1 0 1.911070 0.851252 0.696782

13 1 0 2.384278 2.285180 0.412846

---------------------------------------------------------------------

**TSHMF2n···H2O**

---------------------------------------------------------------------

Center Atomic Atomic Coordinates (Angstroms)

Number Number Type X Y Z

---------------------------------------------------------------------

1 6 0 -1.006510 0.511611 0.569120

2 8 0 -1.024724 -0.509185 1.442966

3 1 0 -1.466182 1.453444 0.891236

4 1 0 -1.290651 0.270620 -0.464980

5 6 0 1.269736 0.366891 -0.617466

6 1 0 0.363006 -0.071315 1.350763

7 7 0 0.545176 0.768257 0.570011

8 1 0 0.871696 1.668955 0.916848

9 1 0 0.866930 -0.559439 -1.044517

10 8 0 2.188951 1.001614 -1.018352

11 8 0 -0.346054 -2.201857 -0.454735

12 1 0 -0.710285 -1.784725 0.361875

13 1 0 -0.686741 -3.095307 -0.490494

---------------------------------------------------------------------

**CH2CH2**

---------------------------------------------------------------------

Center Atomic Atomic Coordinates (Angstroms)

Number Number Type X Y Z

---------------------------------------------------------------------

1 6 0 -2.011784 -0.070431 0.000000

2 6 0 -0.700223 -0.240233 0.000000

3 1 0 -2.452819 0.918042 0.000000

4 1 0 -2.689929 -0.914036 0.000000

5 1 0 -0.022078 0.603373 0.000000

6 1 0 -0.259188 -1.228705 0.000000

---------------------------------------------------------------------

**CH2OO···CH2CH2···H2O**

---------------------------------------------------------------------

Center Atomic Atomic Coordinates (Angstroms)

Number Number Type X Y Z

---------------------------------------------------------------------

1 6 0 -0.985438 -0.650918 -1.035917

2 8 0 -1.443770 -0.763947 0.110228

3 8 0 -1.207794 0.230391 0.997261

4 1 0 -0.482790 0.261868 -1.338301

5 1 0 -1.172001 -1.499552 -1.682317

6 6 0 1.492363 -0.574250 0.850324

7 1 0 1.233893 -1.358826 1.549381

8 1 0 1.529314 0.436144 1.230643

9 1 0 1.981024 -0.026904 -1.111753

10 8 0 0.380425 2.026975 -0.365810

11 1 0 -0.168246 1.504066 0.252058

12 1 0 0.028730 2.917852 -0.340765

13 6 0 1.741567 -0.831238 -0.427390

14 1 0 1.728247 -1.843561 -0.814481

---------------------------------------------------------------------

**TSade···H2O**

---------------------------------------------------------------------

Center Atomic Atomic Coordinates (Angstroms)

Number Number Type X Y Z

---------------------------------------------------------------------

1 6 0 -1.580661 -0.531236 0.766230

2 6 0 -1.459997 0.408620 -0.194189

3 1 0 -1.773489 -0.257650 1.794374

4 1 0 -1.549141 -1.583825 0.528954

5 1 0 -1.364104 0.116763 -1.231601

6 1 0 -1.682496 1.448884 0.012573

7 8 0 1.181172 -0.337356 0.232860

8 6 0 0.727030 0.834937 0.168768

9 1 0 0.441133 1.331781 1.086300

10 1 0 0.961639 1.370464 -0.742469

11 8 0 0.786671 -0.995314 1.354769

12 8 0 -0.038910 -3.120444 -0.204794

13 1 0 0.551738 -3.871637 -0.262637

14 1 0 0.367153 -2.508574 0.434727

---------------------------------------------------------------------

**IMe···H2O**

---------------------------------------------------------------------

Center Atomic Atomic Coordinates (Angstroms)

Number Number Type X Y Z

---------------------------------------------------------------------

1 6 0 -1.234548 -0.670304 0.866307

2 6 0 -1.044819 0.568674 -0.022228

3 1 0 -1.951681 -0.527334 1.671026

4 1 0 -1.479928 -1.551337 0.273682

5 1 0 -1.449704 0.399012 -1.016317

6 1 0 -1.502462 1.457138 0.404439

7 8 0 0.953419 -0.558476 0.457798

8 6 0 0.485991 0.690226 -0.032922

9 1 0 0.826306 1.486867 0.629501

10 1 0 0.913777 0.809566 -1.025455

11 8 0 0.029492 -0.864660 1.493975

12 8 0 0.220028 -3.267576 -0.174963

13 1 0 0.669614 -2.431282 -0.335504

14 1 0 0.154916 -3.285529 0.782921

---------------------------------------------------------------------

**TSisoe···H2O**

---------------------------------------------------------------------

Center Atomic Atomic Coordinates (Angstroms)

Number Number Type X Y Z

---------------------------------------------------------------------

1 6 0 1.468940 -0.488771 -0.164486

2 8 0 0.200055 -0.994415 -0.022734

3 8 0 -0.388663 0.484836 1.216376

4 1 0 1.850412 -0.787916 -1.147489

5 1 0 2.139155 -0.901978 0.593866

6 6 0 -0.078869 1.213354 0.189923

7 1 0 -0.762497 2.022516 -0.085981

8 1 0 -0.478351 0.359653 -0.629404

9 1 0 1.667262 1.563121 -1.060257

10 6 0 1.379303 1.094062 -0.121962

11 1 0 2.000371 1.465877 0.690980

12 8 0 -2.652287 -0.450500 -0.305194

13 1 0 -2.253905 -0.246124 0.547557

14 1 0 -2.164615 -1.227509 -0.589635

---------------------------------------------------------------------

**HPA···H2O**

---------------------------------------------------------------------

Center Atomic Atomic Coordinates (Angstroms)

Number Number Type X Y Z

---------------------------------------------------------------------

1 6 0 0.850970 0.348258 0.589461

2 6 0 -1.317494 0.216259 -0.668357

3 1 0 0.700812 -1.437045 -0.116623

4 1 0 -2.037100 0.653447 -1.382461

5 8 0 -1.513818 -0.884587 -0.217220

6 8 0 1.402790 -0.784829 -0.046453

7 1 0 1.679733 1.012213 0.828594

8 6 0 -0.136878 1.069183 -0.313994

9 1 0 0.342473 1.382120 -1.246059

10 1 0 -0.535062 1.965011 0.171443

11 1 0 0.351171 0.077219 1.521540

12 8 0 -1.967687 0.867233 2.092894

13 1 0 -1.991819 -0.045978 1.791381

14 1 0 -2.463913 0.886087 2.912753

---------------------------------------------------------------------

**TSHPA1···H2O**

---------------------------------------------------------------------

Center Atomic Atomic Coordinates (Angstroms)

Number Number Type X Y Z

---------------------------------------------------------------------

1 6 0 0.413217 -0.088106 0.820165

2 6 0 -1.319127 0.141238 -0.925432

3 1 0 -0.057804 -1.243176 -0.864396

4 1 0 -2.359880 0.200548 -0.610579

5 8 0 -0.931963 -0.966301 -1.461858

6 8 0 0.719876 -1.184544 0.243887

7 1 0 1.200438 0.651819 0.981734

8 6 0 -0.411313 1.114973 -0.576674

9 1 0 0.516444 1.163347 -1.129125

10 1 0 -0.761630 2.014583 -0.092369

11 1 0 -0.389230 -0.086990 1.562898

12 8 0 -1.905351 -2.041276 1.063076

13 1 0 -2.255261 -2.248709 0.193590

14 1 0 -0.953295 -2.152466 0.947425

---------------------------------------------------------------------

**TSHPA2···H2O**

---------------------------------------------------------------------

Center Atomic Atomic Coordinates (Angstroms)

Number Number Type X Y Z

---------------------------------------------------------------------

1 6 0 -1.302812 -0.119089 -0.543222

2 6 0 1.248387 -0.268569 0.458371

3 1 0 0.293836 -0.939369 0.092248

4 1 0 1.573257 -0.473605 1.495121

5 8 0 1.943033 0.319126 -0.324105

6 8 0 -1.069466 -1.401158 -0.360132

7 1 0 -2.322868 0.237932 -0.130429

8 6 0 -0.708140 0.734593 0.467628

9 1 0 -0.800665 0.416020 1.502771

10 1 0 -0.544678 1.789866 0.271116

11 1 0 -1.233474 0.272505 -1.565057

12 8 0 -0.788332 -1.620808 2.333869

13 1 0 -0.990385 -2.415578 2.828113

14 1 0 -1.025685 -1.797867 1.404042

---------------------------------------------------------------------

**OH-CH=CH2**

---------------------------------------------------------------------

Center Atomic Atomic Coordinates (Angstroms)

Number Number Type X Y Z

---------------------------------------------------------------------

1 6 0 -1.297595 0.167818 -0.874818

2 1 0 -0.013673 -1.179162 -1.286090

3 1 0 -2.370993 0.298306 -0.849550

4 8 0 -0.970602 -1.084660 -1.272224

5 6 0 -0.454440 1.136639 -0.550357

6 1 0 0.617682 0.988071 -0.580974

7 1 0 -0.835652 2.098200 -0.246420

---------------------------------------------------------------------

**CH3CHO**

---------------------------------------------------------------------

Center Atomic Atomic Coordinates (Angstroms)

Number Number Type X Y Z

---------------------------------------------------------------------

1 6 0 -1.197586 -0.385860 -0.581581

2 8 0 -0.553591 -1.392336 -0.501276

3 1 0 -2.056308 0.957880 0.823256

4 6 0 -1.081950 0.773225 0.365563

5 1 0 -0.335051 0.568871 1.128664

6 1 0 -0.817465 1.670358 -0.198329

7 1 0 -1.940152 -0.261470 -1.393623

---------------------------------------------------------------------


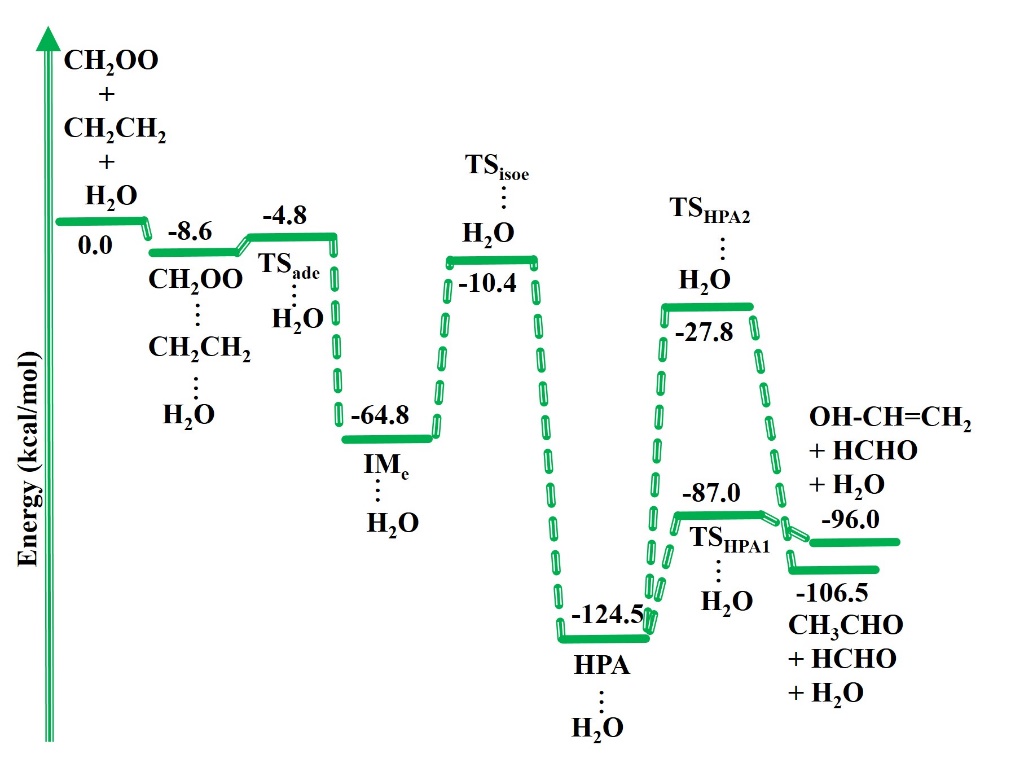


**Figure S1.** Zero-point corrected potential energy surface for the water assisted CH2OO + CH2CH2 reaction obtained using CCSD(T)/6-311++G (3df,3pd)//M06-2X/6-311++G(3df,3pd) level.


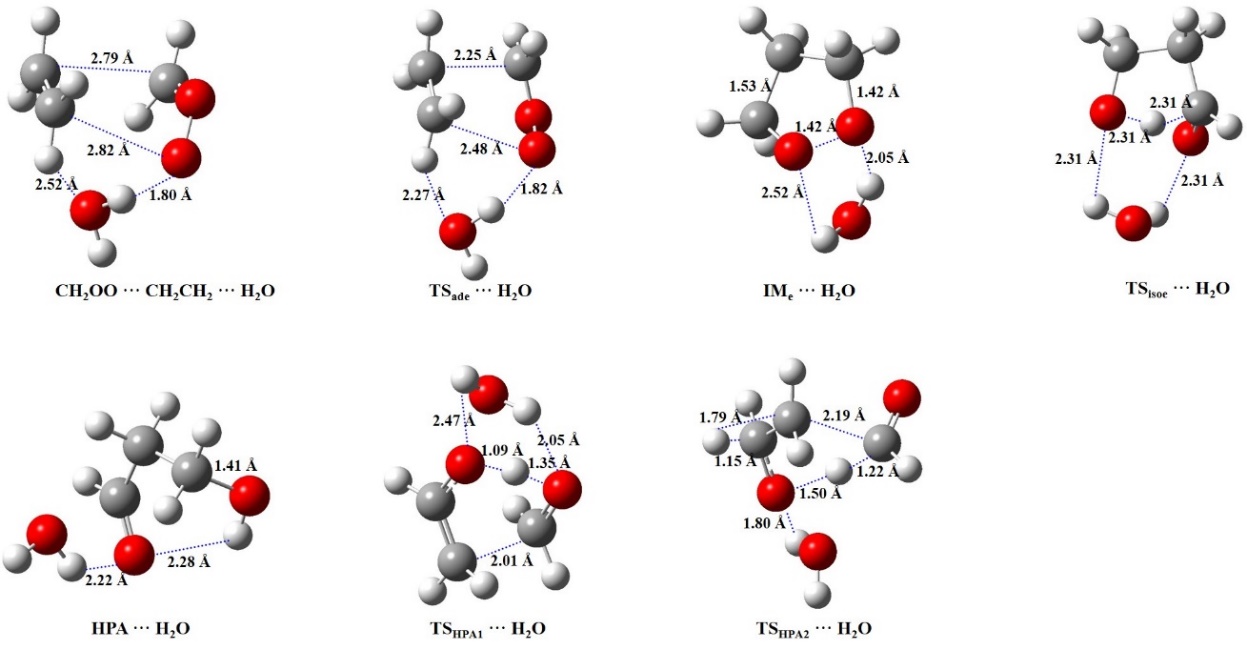


**Figure S2.** Structural and geometrical changes for the water-assisted •CH2OO• + CH2CH2 reaction calculated using M06-2X/6–311++G (3df,3pd).


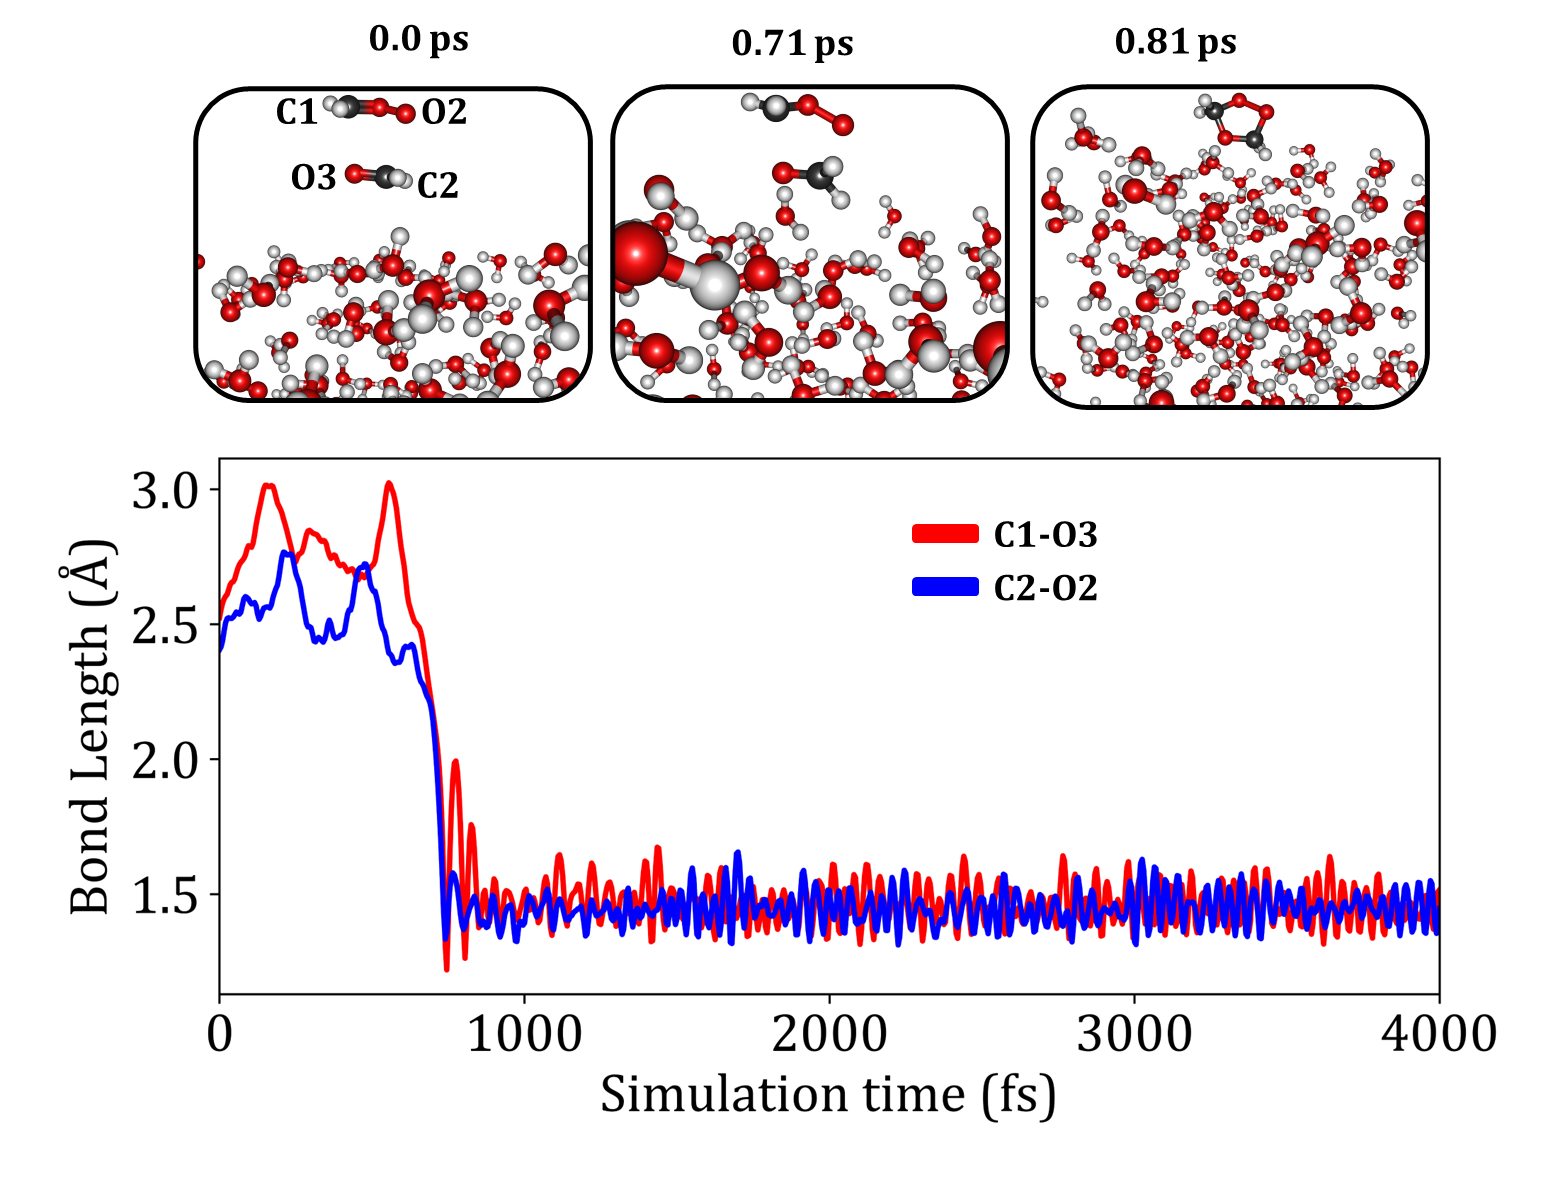


**Figure S3.** Dynamic trajectories and varying bond lengths for the cyclic ozonide (SOZ) formation from CH2OO and CH2O reaction at the air-water interface.
